# Supplementary material
Source: PubMed Central journal article supplement (PMC2945928)
Supplement: blood-2008-06-163303_1.pdf [file blood-2008-06-163303_1.pdf]

(A)

| Symbol | Description                                | AVG C <sub>t</sub> without normalization |                              | Fold Up- or Down-Regulation |
|--------|--------------------------------------------|------------------------------------------|------------------------------|-----------------------------|
|        |                                            | TCL-1 Old<br>CD5+ Tumor B                | TCL-1 Young<br>CD5- Normal B | Tumor B/Normal B            |
| Fzd1   | Frizzled homolog 1 (Drosophila)            | 30.9                                     | ND                           | <b>11.4</b>                 |
| Fzd2   | Frizzled homolog 2 (Drosophila)            | ND                                       | ND                           | NA                          |
| Fzd3   | Frizzled homolog 3 (Drosophila)            | ND                                       | 34.5                         | -2.1                        |
| Fzd4   | Frizzled homolog 4 (Drosophila)            | 33.8                                     | ND                           | 1.6                         |
| Fzd5   | Frizzled homolog 5 (Drosophila)            | 29.3                                     | 28.1                         | -3.5                        |
| Fzd6   | Frizzled homolog 6 (Drosophila)            | 25.6                                     | 31.3                         | <b>34.8</b>                 |
| Fzd7   | Frizzled homolog 7 (Drosophila)            | 32.8                                     | 34.7                         | 2.6                         |
| Fzd8   | Frizzled homolog 8 (Drosophila)            | ND                                       | ND                           | NA                          |
| Wnt1   | Wingless-related MMTV integration site 1   | ND                                       | ND                           | NA                          |
| Wnt10a | Wingless related MMTV integration site 10a | 27.5                                     | 30.0                         | <b>4.0</b>                  |
| Wnt11  | Wingless-related MMTV integration site 11  | ND                                       | ND                           | NA                          |
| Wnt16  | Wingless-related MMTV integration site 16  | 30.7                                     | 34.1                         | <b>7.5</b>                  |
| Wnt2   | Wingless-related MMTV integration site 2   | ND                                       | ND                           | NA                          |
| Wnt2b  | Wingless related MMTV integration site 2b  | ND                                       | ND                           | NA                          |
| Wnt3   | Wingless-related MMTV integration site 3   | ND                                       | ND                           | NA                          |
| Wnt3a  | Wingless-related MMTV integration site 3A  | ND                                       | ND                           | NA                          |
| Wnt4   | Wingless-related MMTV integration site 4   | 35.0                                     | 34.2                         | -2.6                        |
| Wnt5a  | Wingless-related MMTV integration site 5A  | ND                                       | ND                           | NA                          |
| Wnt5b  | Wingless-related MMTV integration site 5B  | ND                                       | ND                           | NA                          |
| Wnt6   | Wingless-related MMTV integration site 6   | ND                                       | ND                           | NA                          |
| Wnt7a  | Wingless-related MMTV integration site 7A  | ND                                       | ND                           | NA                          |
| Wnt7b  | Wingless-related MMTV integration site 7B  | ND                                       | ND                           | NA                          |
| Wnt8a  | Wingless-related MMTV integration site 8A  | ND                                       | ND                           | NA                          |
| Wnt8b  | Wingless related MMTV integration site 8b  | 34.8                                     | ND                           | -1.2                        |
| Wnt9a  | Wingless-type MMTV integration site 9A     | ND                                       | ND                           | NA                          |

(B)

| Symbol  | Description                                         | AVG C, without normalization |                              | Fold Up- or Down-Regulation | Symbol   | Description                                                                      | AVG C, without normalization |                              | Fold Up- or Down-Regulation |
|---------|-----------------------------------------------------|------------------------------|------------------------------|-----------------------------|----------|----------------------------------------------------------------------------------|------------------------------|------------------------------|-----------------------------|
|         |                                                     | TCL-1 Old<br>CD5+ Tumor B    | TCL-1 Young<br>CD5- Normal B | Tumor B/Normal B            |          |                                                                                  | TCL-1 Old<br>CD5+ Tumor B    | TCL-1 Young<br>CD5- Normal B | Tumor B/Normal B            |
| Aes     | Amino-terminal enhancer of split                    | 23.6                         | 24.1                         | -1.1                        | Jun      | Jun oncogene                                                                     | 21.5                         | 23.9                         | 3.7                         |
| Apc     | Adenomatosis polyposis coli<br>Axin 1               | 25.6                         | 25.6                         | -1.5                        | Kremen1  | Kringle containing transmembrane protein 1                                       | 28.4                         | 27.3                         | -3.0                        |
| Axin1   |                                                     | 25.8                         | 25.3                         | -2.0                        | Lef1     | Lymphoid enhancer binding factor 1                                               | 32.2                         | 29.9                         | -7.3                        |
| Bcl9    | B-cell CLL/lymphoma 9                               | 27.4                         | 26.8                         | -2.2                        | Lrp5     | Low density lipoprotein receptor-related protein 5                               | 30.9                         | 32.2                         | 1.6                         |
| Btrc    | Beta-transducin repeat containing protein           | 26.3                         | 26.8                         | -1.1                        | Lrp6     | Low density lipoprotein receptor-related protein 6                               | 25.1                         | 25.5                         | -1.1                        |
| Ctnnbp1 | Catenin beta interacting protein 1                  | 33.2                         | 33.6                         | -1.1                        | Myc      | Myelocytomatosis oncogene                                                        | 23.4                         | 25.0                         | 2.0                         |
| Ccnd1   | Cyclin D1                                           | 28.9                         | 29.7                         | 1.2                         | Nkd1     | Naked cuticle 1 homolog (Drosophila)                                             | ND                           | ND                           | NA                          |
| Ccnd2   | Cyclin D2                                           | 23.6                         | 24.1                         | -1.1                        | Nik      | Nemo like kinase                                                                 | 26.5                         | 26.3                         | -1.7                        |
| Ccnd3   | Cyclin D3                                           | 25.2                         | 26.1                         | 1.3                         | Pitx2    | Paired-like homeodomain transcription factor 2                                   | ND                           | ND                           | NA                          |
| Csnk1a1 | Casein kinase 1, alpha 1                            | 23.6                         | 24.5                         | 1.3                         | Porcn    | Porcupine homolog (Drosophila)                                                   | 34.7                         | ND                           | -1.2                        |
| Csnk1d  | Casein kinase 1, delta                              | 24.8                         | 24.9                         | -1.3                        | Ppp2ca   | Protein phosphatase 2 (formerly 2A), catalytic subunit, alpha isoform            | 22.8                         | 23.2                         | -1.2                        |
| Csnk2a1 | Casein kinase II, alpha 1 polypeptide               | 26.2                         | 26.5                         | -1.2                        | Ppp2r1a  | Protein phosphatase 2 (formerly 2A), regulatory subunit A (PR 65), alpha isoform | 22.7                         | 23.2                         | -1.0                        |
| Ctbp1   | C-terminal binding protein 1                        | 23.4                         | 24.2                         | 1.1                         | Ppp2r5d  | Protein phosphatase 2, regulatory subunit B (B56), delta isoform                 | 26.4                         | 26.5                         | -1.4                        |
| Ctbp2   | C-terminal binding protein 2                        | 30.7                         | 32.4                         | 2.1                         | Pygo1    | Pygopus 1                                                                        | ND                           | ND                           | NA                          |
| Ctnnb1  | Catenin (cadherin associated protein), beta 1       | 24.3                         | 24.4                         | -1.3                        | Rhou     | Ras homolog gene family, member U                                                | 32.8                         | ND                           | 3.2                         |
| Daam1   | Dishevelled associated activator of morphogenesis 1 | 27.0                         | 27.3                         | -1.3                        | Senp2    | SUMO/sentrin specific peptidase 2                                                | 25.6                         | 25.6                         | -1.5                        |
| Dixdc1  | DIX domain containing 1                             | 34.7                         | 33.6                         | -3.1                        | Sfrp1    | Secreted frizzled-related sequence protein 1                                     | ND                           | ND                           | NA                          |
| Dkk1    | Dickkopf homolog 1 (Xenopus laevis)                 | ND                           | ND                           | NA                          | Sfrp2    | Secreted frizzled-related sequence protein 2                                     | ND                           | ND                           | NA                          |
| Dvl1    | Dishevelled 1, dsh homolog 1 (Drosophila)           | ND                           | ND                           | NA                          | Sfrp4    | Secreted frizzled-related sequence protein 4                                     | ND                           | ND                           | NA                          |
| Dvl2    | Dishevelled 2, dsh homolog (Drosophila)             | 27.2                         | 27.3                         | -1.4                        | Slc9a3r1 | Solute carrier family 9 (sodium/hydrogen exchanger), isoform 3 regulator 1       | 24.7                         | 25.0                         | -1.2                        |
| Ep300   | E1A binding protein p300                            | 24.8                         | 25.4                         | 1.0                         | Sox17    | SRY-box containing gene 17                                                       | ND                           | ND                           | NA                          |
| Fbxw11  | F-box and WD-40 domain protein 11                   | 25.3                         | 25.4                         | -1.4                        | T        | Brachyury                                                                        | ND                           | ND                           | NA                          |
| Fbxw2   | F-box and WD-40 domain protein 2                    | 25.4                         | 25.7                         | -1.2                        | Tcf3     | Transcription factor 3                                                           | ND                           | ND                           | NA                          |
| Fbxw4   | F-box and WD-40 domain protein 4                    | 26.3                         | 26.2                         | -1.5                        | Tcf7     | Transcription factor 7, T-cell specific                                          | 28.4                         | 28.6                         | -1.3                        |
| Fgf4    | Fibroblast growth factor 4                          | ND                           | ND                           | NA                          | Tie1     | Transducin-like enhancer of split 1, homolog of Drosophila E(spl)                | 32.0                         | 27.7                         | -28.1                       |
| Fosl1   | Fos-like antigen 1                                  | 34.2                         | 33.7                         | -2.0                        | Tie2     | Transducin-like enhancer of split 2, homolog of Drosophila E(spl)                | 33.9                         | 31.8                         | -6.5                        |
| Foxn1   | Forkhead box N1                                     | ND                           | ND                           | NA                          | Wif1     | Wnt inhibitory factor 1                                                          | ND                           | ND                           | NA                          |
| Frat1   | Frequently rearranged in advanced T-cell lymphomas  | 30.9                         | 28.4                         | -8.4                        | Wisp1    | WNT1 inducible signaling pathway protein 1                                       | 35.0                         | 35.0                         | -1.5                        |
| Frzb    | Frizzled-related protein                            | 34.7                         | ND                           | NA                          | Hprt1    | Hypoxanthine guanine phosphoribosyl transferase 1                                | 23.5                         | 23.8                         | -1.2                        |
| Fshb    | Follicle stimulating hormone beta                   | 34.7                         | ND                           | NA                          | Gapdh    | Glyceraldehyde-3-phosphate dehydrogenase                                         | 20.9                         | 21.7                         | 1.2                         |
| Gsk3b   | Glycogen synthase kinase 3 beta                     | 23.4                         | 23.3                         | -1.5                        |          |                                                                                  |                              |                              |                             |
