# Supplementary material
Source: PubMed Central journal article supplement (PMC2945928)
Supplement: blood-2008-06-163303_2.pdf [file blood-2008-06-163303_2.pdf]

| Gene          | Forward Primer                            | Reverse Primer        |
|---------------|-------------------------------------------|-----------------------|
| Real-Time PCR |                                           |                       |
| FZD6          | CCTTACCAGGCAAATCCAAA                      | TTTGCTTCCAACCCAGAAGA  |
| Wnt10a        | CTCGGAACAAAGTCCCCTAC                      | GCAAGCCTTCAGTTTACCC   |
| Wnt16         | TTCCCATCAGAAACACCACA                      | CAGGTTTTTCACAGCACAGGA |
| Lrp5          | CGACCGCCAGCAGCAGATG                       | GGGAGCAGCCGCCATTGTC   |
| Lrp6          | AAGCTGCTGGAGAATGGAAA                      | TCCAAAGAAATTCGCCTCAA  |
| Beta-Catenin  | CAAGCAGAGTGCTGAAGGTG                      | GTCGCTGACTTGGGTCTGT   |
| LEF1          | TCATCACCTACAGCGACGAG                      | GAAGGTGGGGATTTTCAGGAG |
| TCF1          | CCCCGATCTCTCTGGATTTT                      | AAGGGGACAGGGGGTAGAG   |
| Myc Oncogene  | TGAAGGCTGGATTTCTTTG                       | GGGCTGTACGGAGTCGTAGT  |
| Jun Oncogene  | CAAGTGCCGGAAAAGGAAG                       | TGTTCCCTGAGCATGTTGG   |
| Cyclin D3     | GGAAGCTATGGACCAGCAAG                      | AGAGCAAGAGTGCCGGGTTAG |
| Vegfa         | CAGGCTGCTGTAACGATGAA                      | TATGTGCTGGCTTTGGTGAG  |
| Beta -actin   | CTTTGCAGCTCCTTCGTTG                       | ATGCCGGAGCCGTTG       |
| Clonity PCR   |                                           |                       |
| JH4           | AAA GAC CTG CAG AGG CCA TTC TTA CC        |                       |
| DSF           | AGG GAT CCT TGT GAA GGG ATC TAC TAC TGT G |                       |
